# Supplementary material for: Inhibin-A and Decorin Secreted by Human Adult Renal Stem/Progenitor Cells Through the TLR2 Engagement Induce Renal Tubular Cell Regeneration
Source: PubMed Central journal article supplement (PMC5557965; doi:10.1038/s41598-017-08474-0), 2017-08-15
Supplement: 41598_2017_8474_MOESM1_ESM.pdf [file 41598_2017_8474_MOESM1_ESM.pdf]

**Inhibin-A and Decorin Secreted by Human Adult Renal Stem/Progenitor Cells  
Through the TLR2 Engagement Induce Renal Tubular Cell Regeneration**

**AUTHORS**

Fabio Sallustio, Claudia Curci, Alessandra Aloisi, Chiara Cristina Toma, Elisabetta Marulli, Grazia Serino, Sharon Natasha Cox, Giuseppe De Palma, Alessandra Stasi, Chiara Divella, Rosaria Rinaldi, Francesco Paolo Schena.

**Supplementary Information**

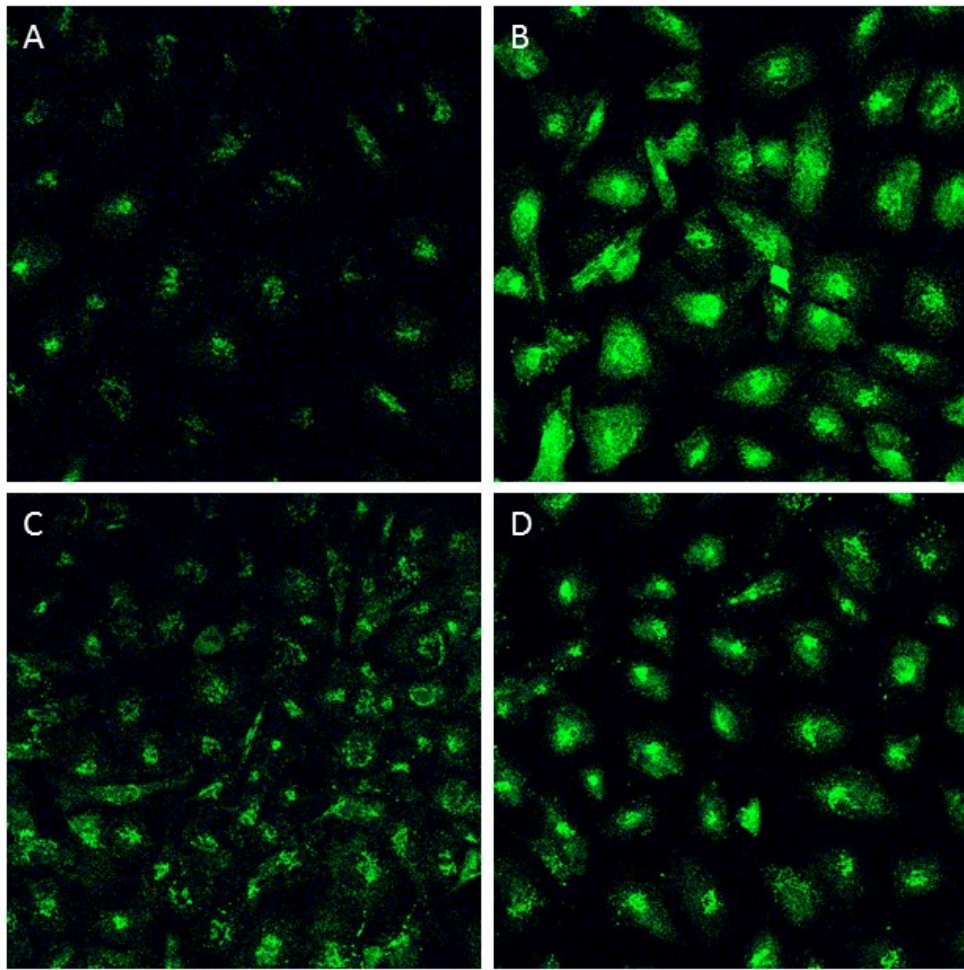

**Figure S1. tARPCs can abrogate cisplatin-induced apoptosis of RPTECs.**

Immunofluorescence stainings show that the cleaved-caspase 3 expression on cisplatin-damaged RPTECs significantly increased (B) compared to untreated cells (A) after one day of cell culture. Instead, when the RPTECs were co-cultured with tARPCs, the cleaved-caspase 3 was less expressed (C). Panel D represents a positive control of cleaved-caspase 3 reaction on RPTECs treated with H<sub>2</sub>O<sub>2</sub>. Magnification 630x.

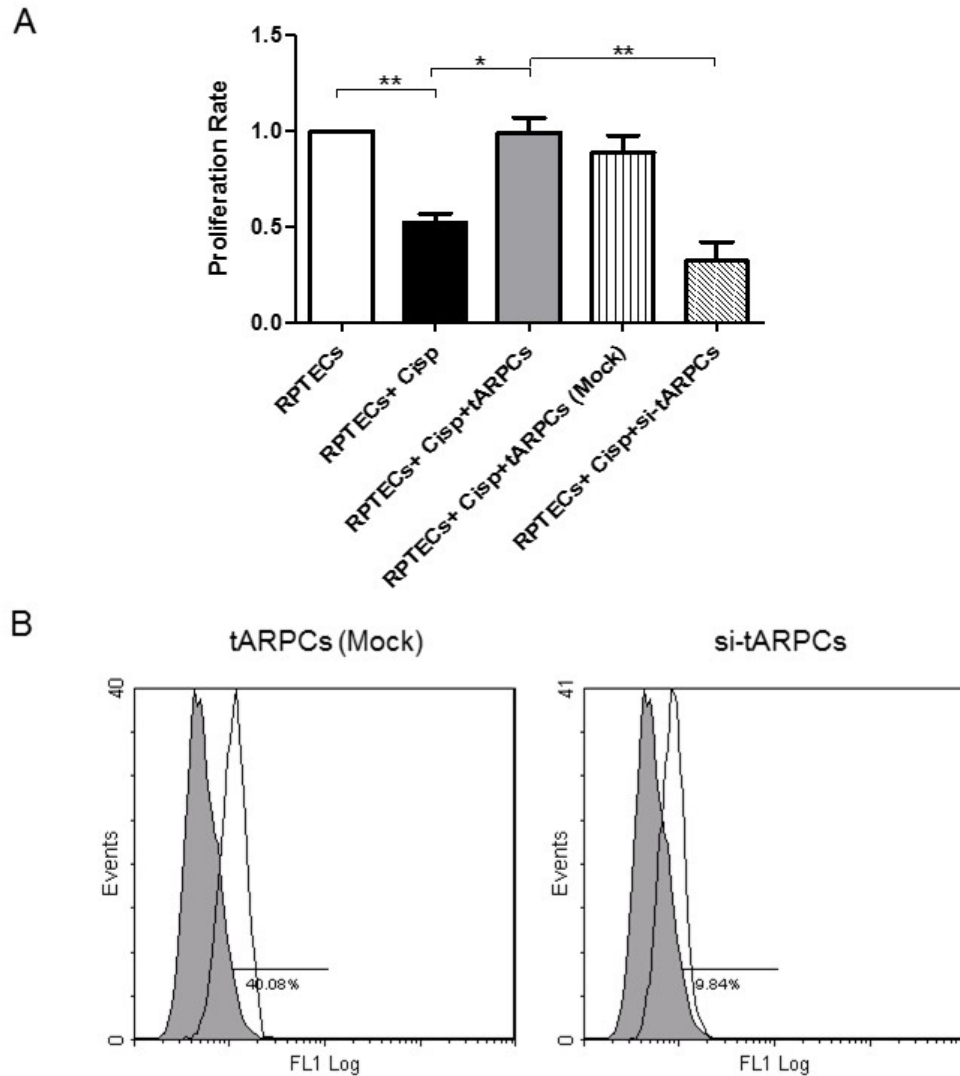

**Figure S2. The TLR2 is responsible for tubular cell regeneration.**

A) A significant inhibition of the recovery process was found when tARPCs were silenced with small interfering RNA for the TLR2 and co-cultured with cisplatin-damaged RPTECs compared to non-silenced tARPCs. The abrogation of the functional effect was observed when TLR2 expression inhibition was approximately 40% or higher. RPTECs without cisplatin were used as control. The mock-transfection control was obtained when cells underwent the cell transfection procedure without adding siRNA.  $* = \leq 0.05$ ,  $** = \leq 0.005$ . B) Efficiency of TLR2 silencing was evaluated by FACS analysis. ARPCs expressing the TLR2 decreased from 40% to 10% after silencing, showing that the efficiency was about 75%.
